# Supplementary material
Source: MDPI journal article supplement (https://www.mdpi.com/2624-781X/2/2/9)
Supplement: s1 [file s1]

*Article*

# **Mechanism of Deoxygenation and Cracking of Fatty Acids by Gas-Phase Cationic Complexes of Ni, Pd, and Pt**

Kevin Parker <sup>1</sup>, Victoria Pho <sup>1</sup>, Richard A.J. O'Hair <sup>2</sup> and Victor Ryzhov <sup>1,\*</sup>

# Supporting Information

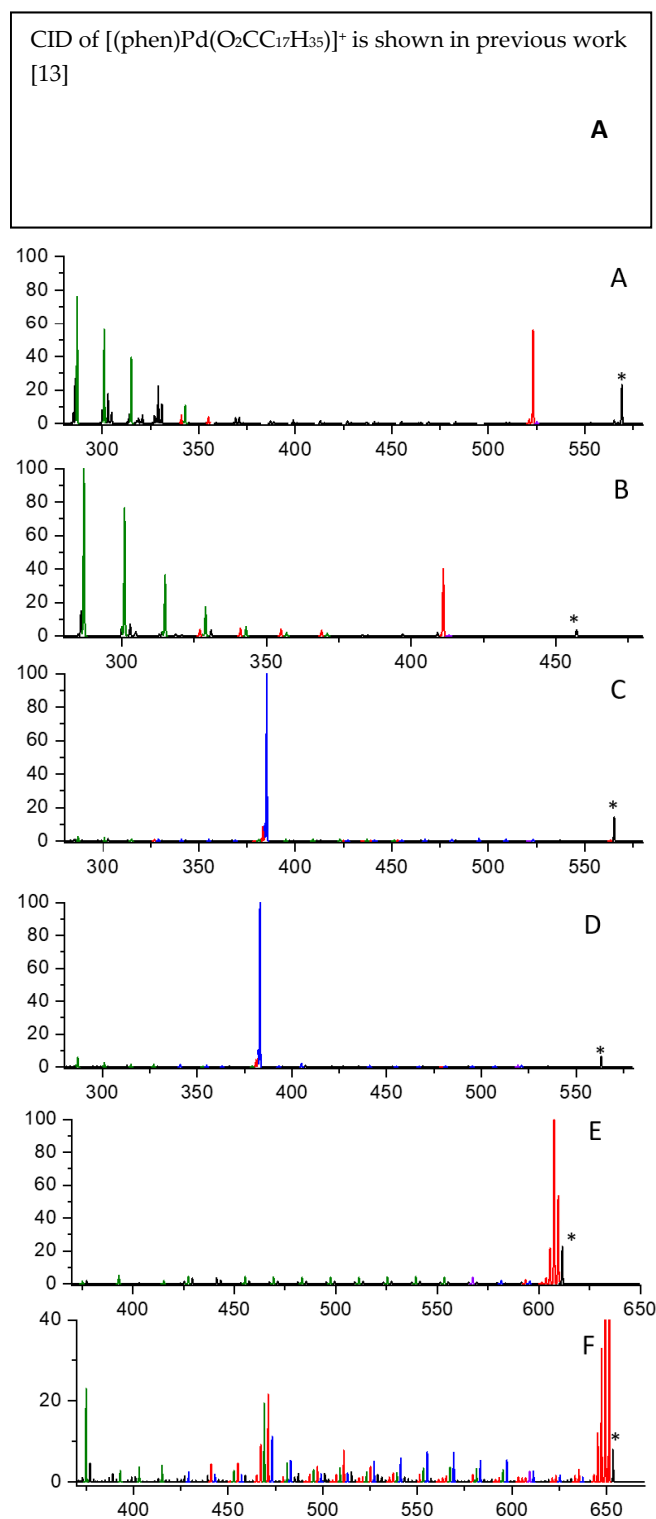

**Figure S1.** (A) CID of  $[(\text{phen})\text{Pd}(\text{O}_2\text{CC}_{17}\text{H}_{35})]^+$  (stearic acid) is shown elsewhere [13] (B) CID of  $[(\text{phen})\text{Pd}(\text{O}_2\text{CC}_{10}\text{H}_{21})]^+$  (undecanoic acid) (C) CID of  $[(\text{phen})\text{Pd}(\text{O}_2\text{CC}_{17}\text{H}_{31})]^+$  (linoleic acid) (D) CID of  $[(\text{phen})\text{Pd}(\text{O}_2\text{CC}_{17}\text{H}_{29})]^+$  (linolenic acid)

(E) CID of [(phen)Pt(O<sub>2</sub>CC<sub>17</sub>H<sub>35</sub>)]<sup>+</sup> (stearic acid) (F) CID of [(phen)Pt(O<sub>2</sub>CC<sub>17</sub>H<sub>31</sub>)]<sup>+</sup> (linoleic acid) *Experiment done on Thermo LTQ at 15 NCE.*

Oleic acid hi-res MS CID

| experimental<br>neutral loss | m/z      | theoretical<br>neutral loss | ppm<br>error | assigned<br>neutral loss        |
|------------------------------|----------|-----------------------------|--------------|---------------------------------|
|                              | 567.2224 |                             |              |                                 |
| 16.033                       | 551.1894 | 16.0313                     | 106.0426     | CH <sub>4</sub>                 |
| 28.0361                      | 539.1863 | 28.0313                     | 171.2372     | C <sub>2</sub> H <sub>4</sub>   |
| 42.047                       | 525.1754 | 42.047                      | 6.76E-10     | C <sub>3</sub> H <sub>6</sub>   |
| 56.0654                      | 511.157  | 56.0626                     | 49.94417     | C <sub>4</sub> H <sub>8</sub>   |
| 70.0781                      | 497.1443 | 70.0783                     | -2.85395     | C <sub>5</sub> H <sub>10</sub>  |
| 84.0945                      | 483.1279 | 84.0939                     | 7.134881     | C <sub>6</sub> H <sub>12</sub>  |
| 98.1103                      | 469.1121 | 98.11                       | 3.057792     | C <sub>7</sub> H <sub>14</sub>  |
| 112.1234                     | 455.099  | 112.1252                    | -16.0535     | C <sub>8</sub> H <sub>16</sub>  |
| 126.1427                     | 441.0797 | 126.1409                    | 14.26976     | C <sub>9</sub> H <sub>18</sub>  |
| 140.1584                     | 427.064  | 140.1565                    | 13.55627     | C <sub>10</sub> H <sub>20</sub> |
| 154.1721                     | 413.0503 | 154.1722                    | -0.64863     | C <sub>11</sub> H <sub>22</sub> |
| 168.1895                     | 399.0329 | 168.1878                    | 10.10775     | C <sub>12</sub> H <sub>24</sub> |
| 182.2054                     | 385.017  | 182.2035                    | 10.4279      | C <sub>13</sub> H <sub>26</sub> |
| 196.2209                     | 371.0015 | 196.2191                    | 9.173419     | C <sub>14</sub> H <sub>28</sub> |
| 210.2377                     | 356.9847 | 210.2348                    | 13.7941      | C <sub>15</sub> H <sub>30</sub> |

**Table S1.** Mass list for high resolution experiment of [(phen)Pd(Oleate)]<sup>+</sup>. The highlighted yellow lines show that the neutral losses of CH<sub>4</sub> and C<sub>2</sub>H<sub>4</sub> do not agree as their ppm error is much higher than allowed. *Experiment done on Bruker Maxis.*

phen\_NiAc\_elaidic acid\_ratio113\_MS2\_519\_23\_041919 #1-24 RT: 0.00-0.49 AV: 24 NL: 3.94E5  
T: ITMS + p ESI Full ms2 519.00@cid23.00 [140.00-800.00]

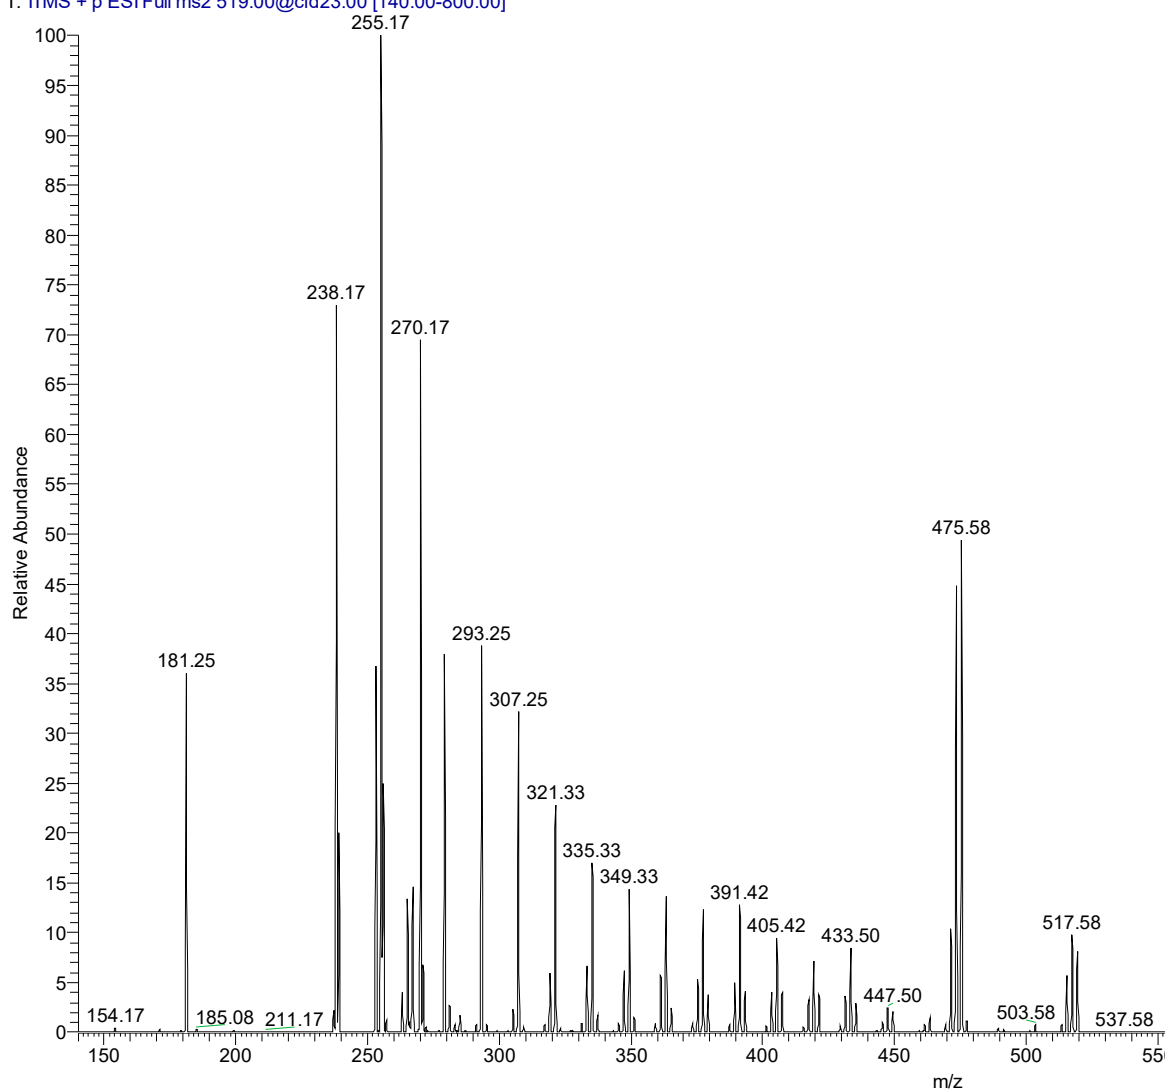

**Figure S2.** CID (23 NCE) spectrum of  $[(\text{phen})\text{Ni}(\text{O}_2\text{CC}_{17}\text{H}_{33})]^+$  (elaidic acid). Experiment done on Thermo LTQ

phen\_MgCl2\_oleic\_acid\_ratio113\_MS2\_485\_39\_022119\_190221095638 #1-26 RT: 0.00-0.50 AV: 26 NL: 4.04E5  
T: ITMS + p ESI Full ms2 485.00@cid39.00 [130.00-600.00]

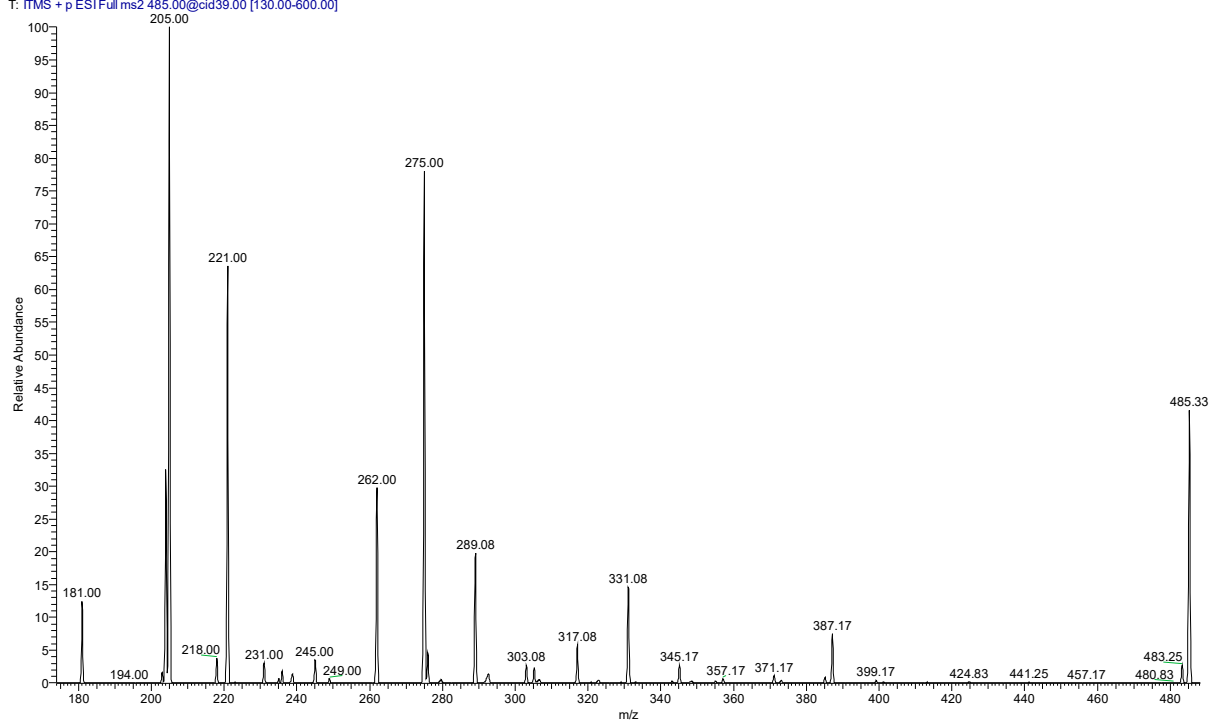

**Figure S3.** CID of [(phen)Mg(O<sub>2</sub>CC<sub>17</sub>H<sub>33</sub>)]<sup>+</sup> for identification of double bond position. *Experiment done on Thermo LTQ at 32 NCE*

phen\_NiAc\_stearic\_acid\_ratio113\_MS2\_521\_21\_012419#1-46 RT: 0.00-0.51 AV: 46 NL: 9.92E5  
T: ITMS + p ESI Full ms2 521.00@cid21.00 [140.00-1500.00]

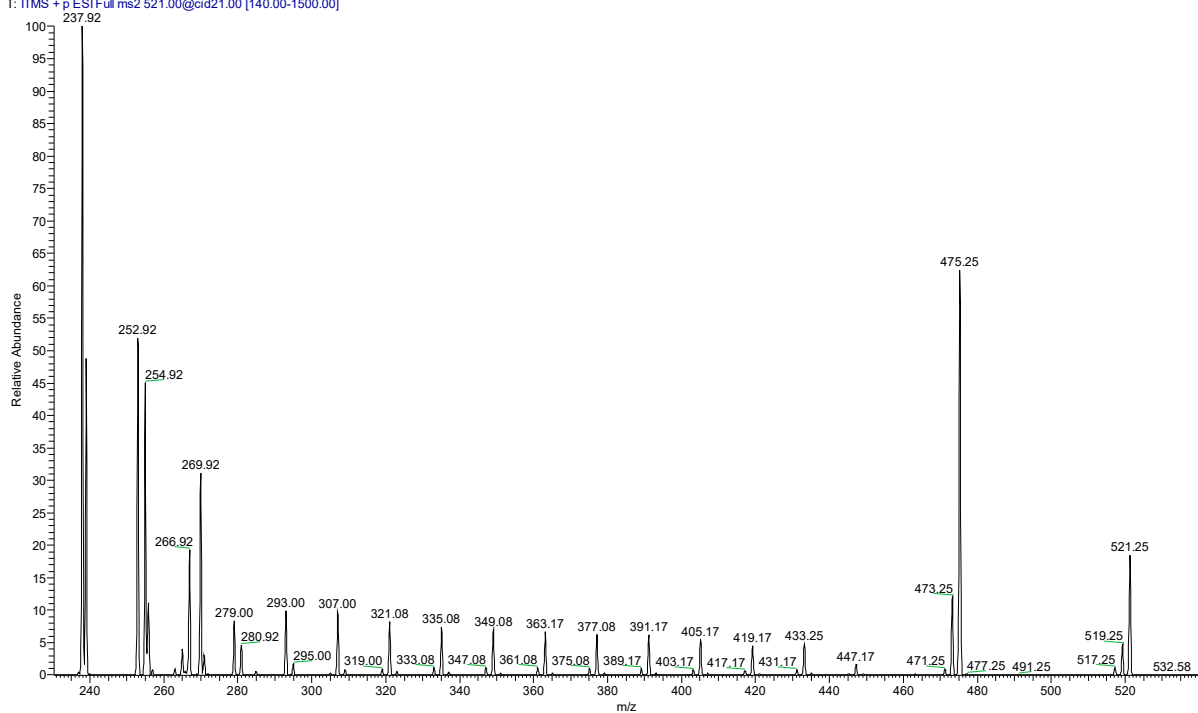

phenNiStearate CID 433 CID #1-19 RT: 0.00-0.51 AV: 19 NL: 2.54  
T: ITMS + p ESI Full ms3 521.00@cid20.00 433.00@cid15.00 [115.00-700.00]

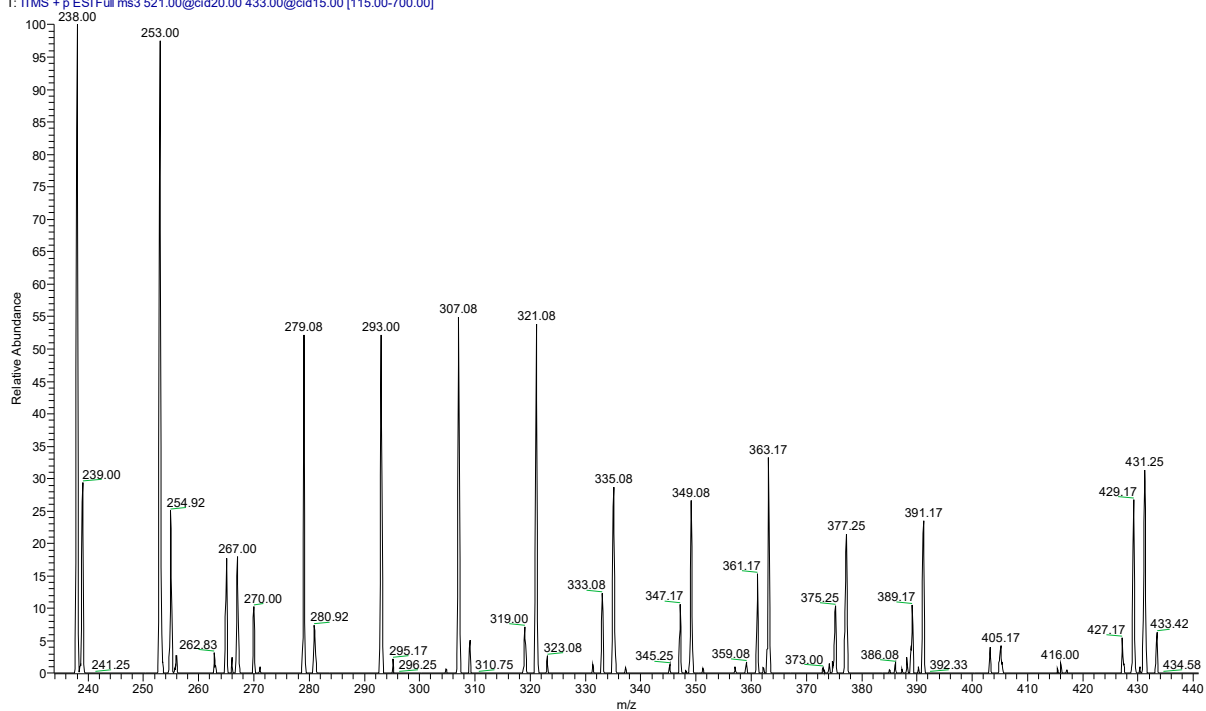

**Figure S4.** (A) CID of [(phen)Ni(O<sub>2</sub>CC<sub>17</sub>H<sub>35</sub>)]<sup>+</sup> with neutral loss of CO<sub>2</sub>, H<sub>2</sub>, and C<sub>3</sub>H<sub>6</sub> at m/z 433. (B) CID of m/z 433, [(phen)Ni(C<sub>14</sub>H<sub>29</sub>)]<sup>+</sup> Experiment done on Thermo LTQ at 21 and 15 NCE respectively

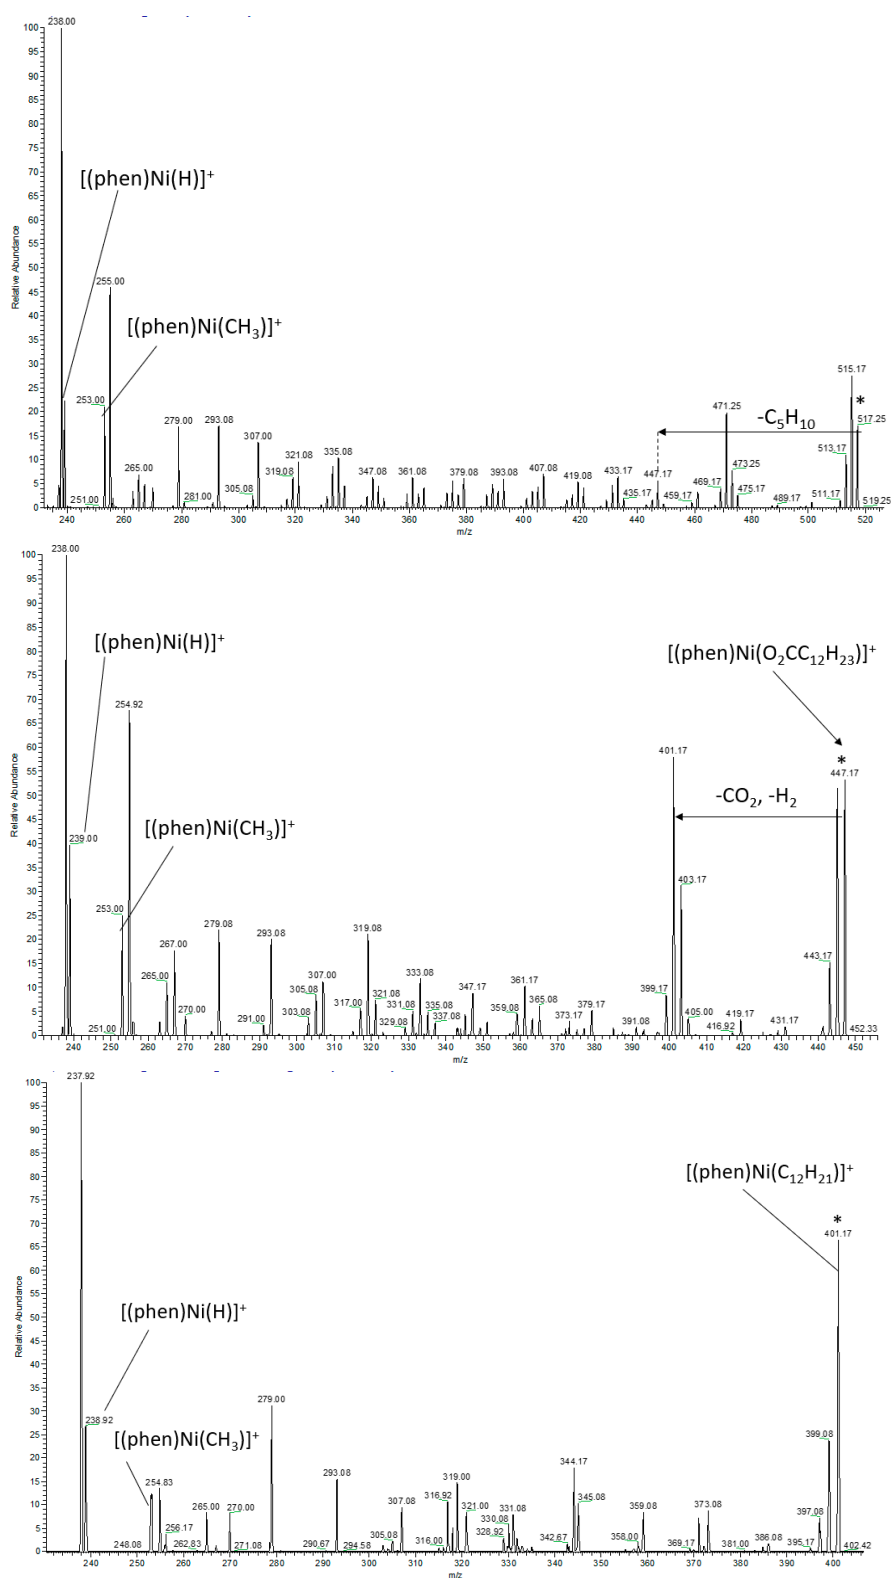

**Figure S5.** MS<sup>n</sup> experiments of unsaturated fatty acid complexes leading to formation of metal hydride, methyl, and vinyl species. (A) CID of  $[(\text{phen})\text{Ni}(\text{O}_2\text{CC}_{17}\text{H}_{31})]^+$  (B) CID of  $[(\text{phen})\text{Ni}(\text{O}_2\text{CC}_{12}\text{H}_{21})]^+$  (C) CID of  $[(\text{phen})\text{Ni}(\text{C}_{12}\text{H}_{21})]^+$  Experiment done on Thermo LTQ

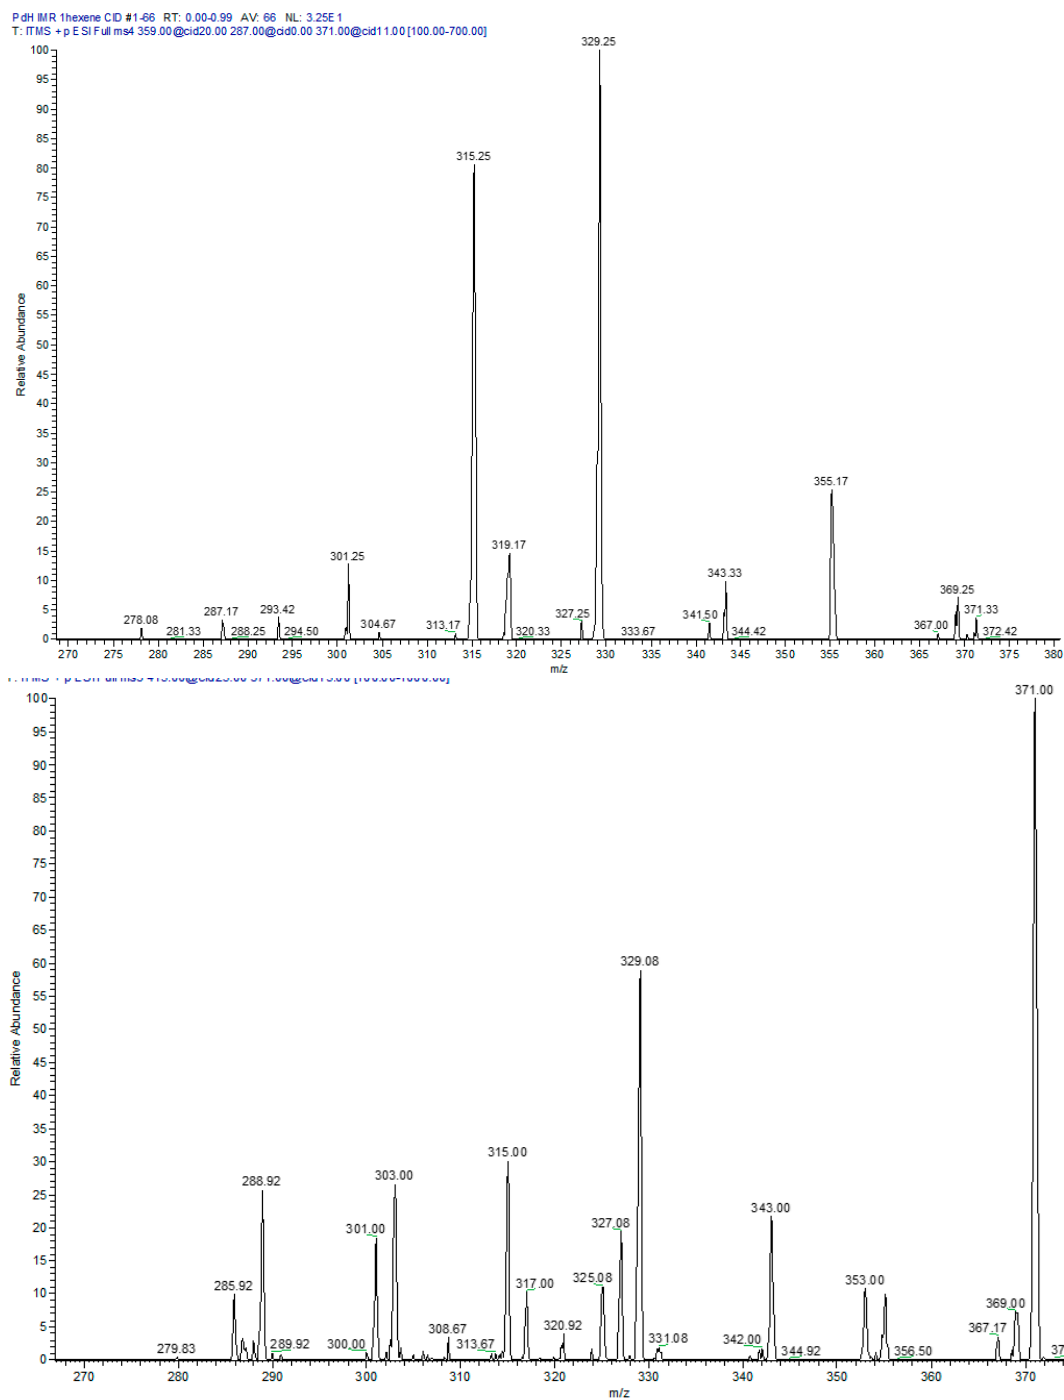

**Figure S6.** CID of  $[(\text{phen})\text{Pd}(\text{C}_6\text{H}_{11})]^+$  formed via IMR between metal hydride and 1-hexene (A) and the decarboxylation of heptanoic acid (B) Experiment done on Thermo LTQ at 15 and 11 NCE respectively



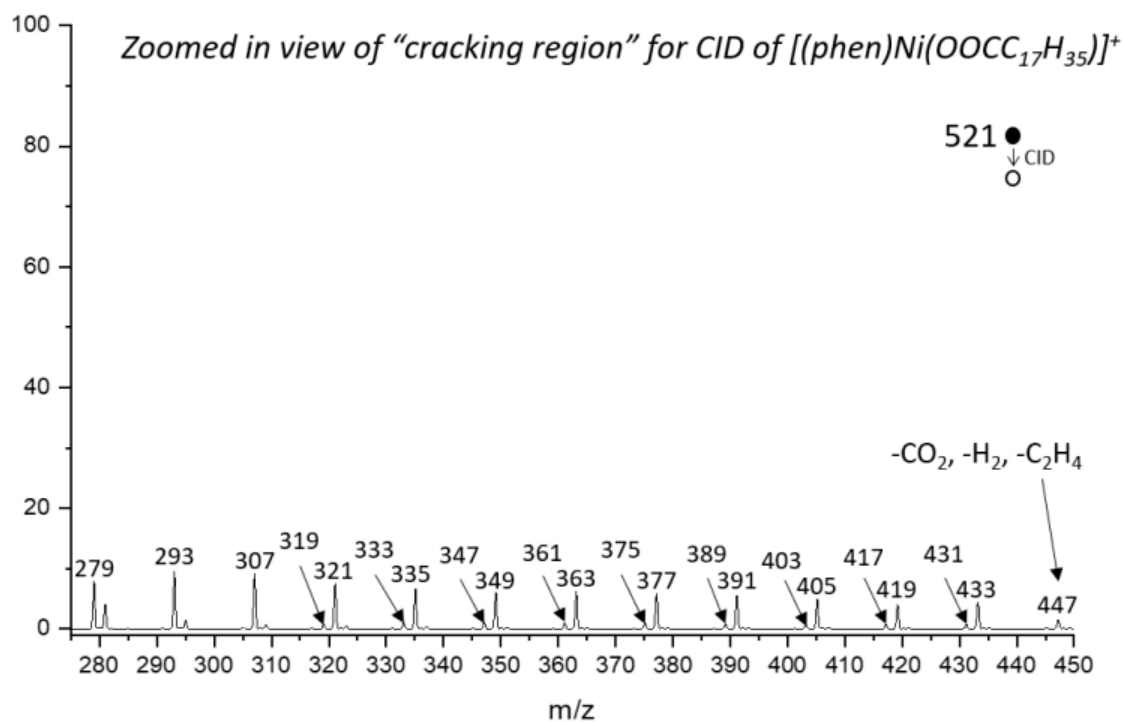

**Figure S7.** Zoomed in region of deoxygenation for CID of  $[(\text{phen})\text{Ni}(\text{O}_2\text{CC}_{17}\text{H}_{35})]^+$  Experiment done on Bruker Maxis

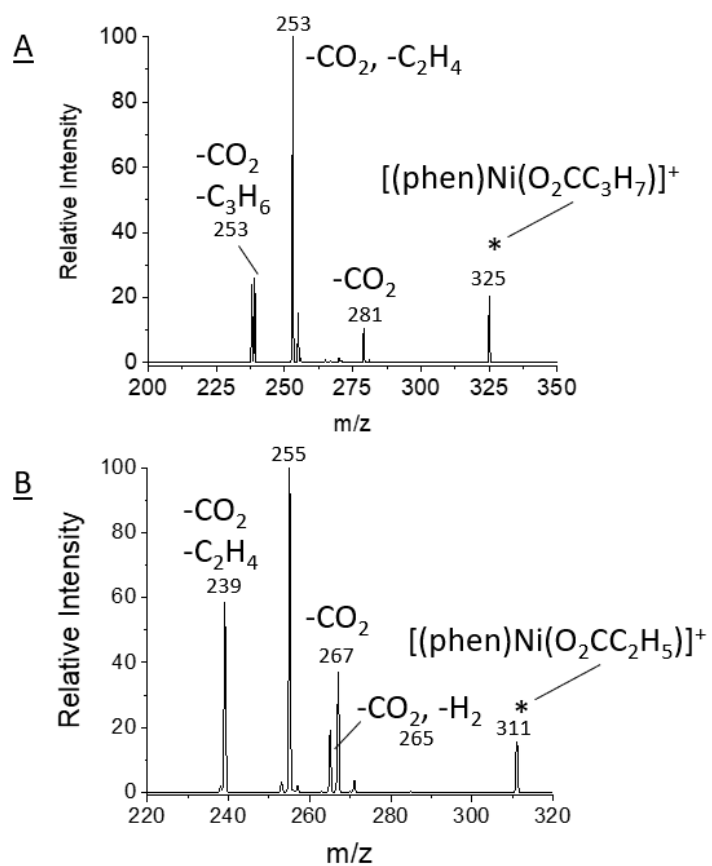

**Figure S8.** (A) CID of  $[(\text{phen})\text{Ni}(\text{O}_2\text{CC}_3\text{H}_7)]^+$  (B) CID of  $[(\text{phen})\text{Ni}(\text{O}_2\text{CC}_2\text{H}_5)]^+$  Experiment done on Thermo LTQ at 15 NCE. (Data previously published Parker, Kevin, et al. "Gas-Phase Models for the Nickel-and Palladium-Catalyzed Deoxygenation of Fatty Acids." *ChemCatChem* 12.21 (2020): 5476-5485.)

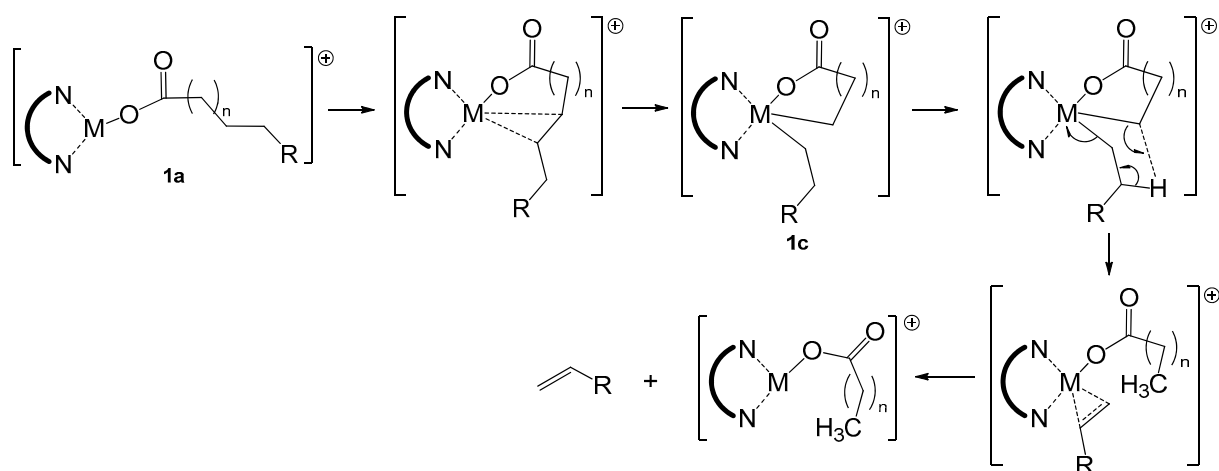

**Scheme S1.** Lactone carbon bound to the metal can abstract hydrogen from the free R-containing chain, forming a saturated carboxylate complex and extruding R-CH=CH<sub>2</sub>
